# Supplementary material for: Linked within-host and between-host models and data for infectious diseases: a systematic review
Source: PeerJ journal article supplement (doi:10.7717/peerj.7057), 2019-06-19

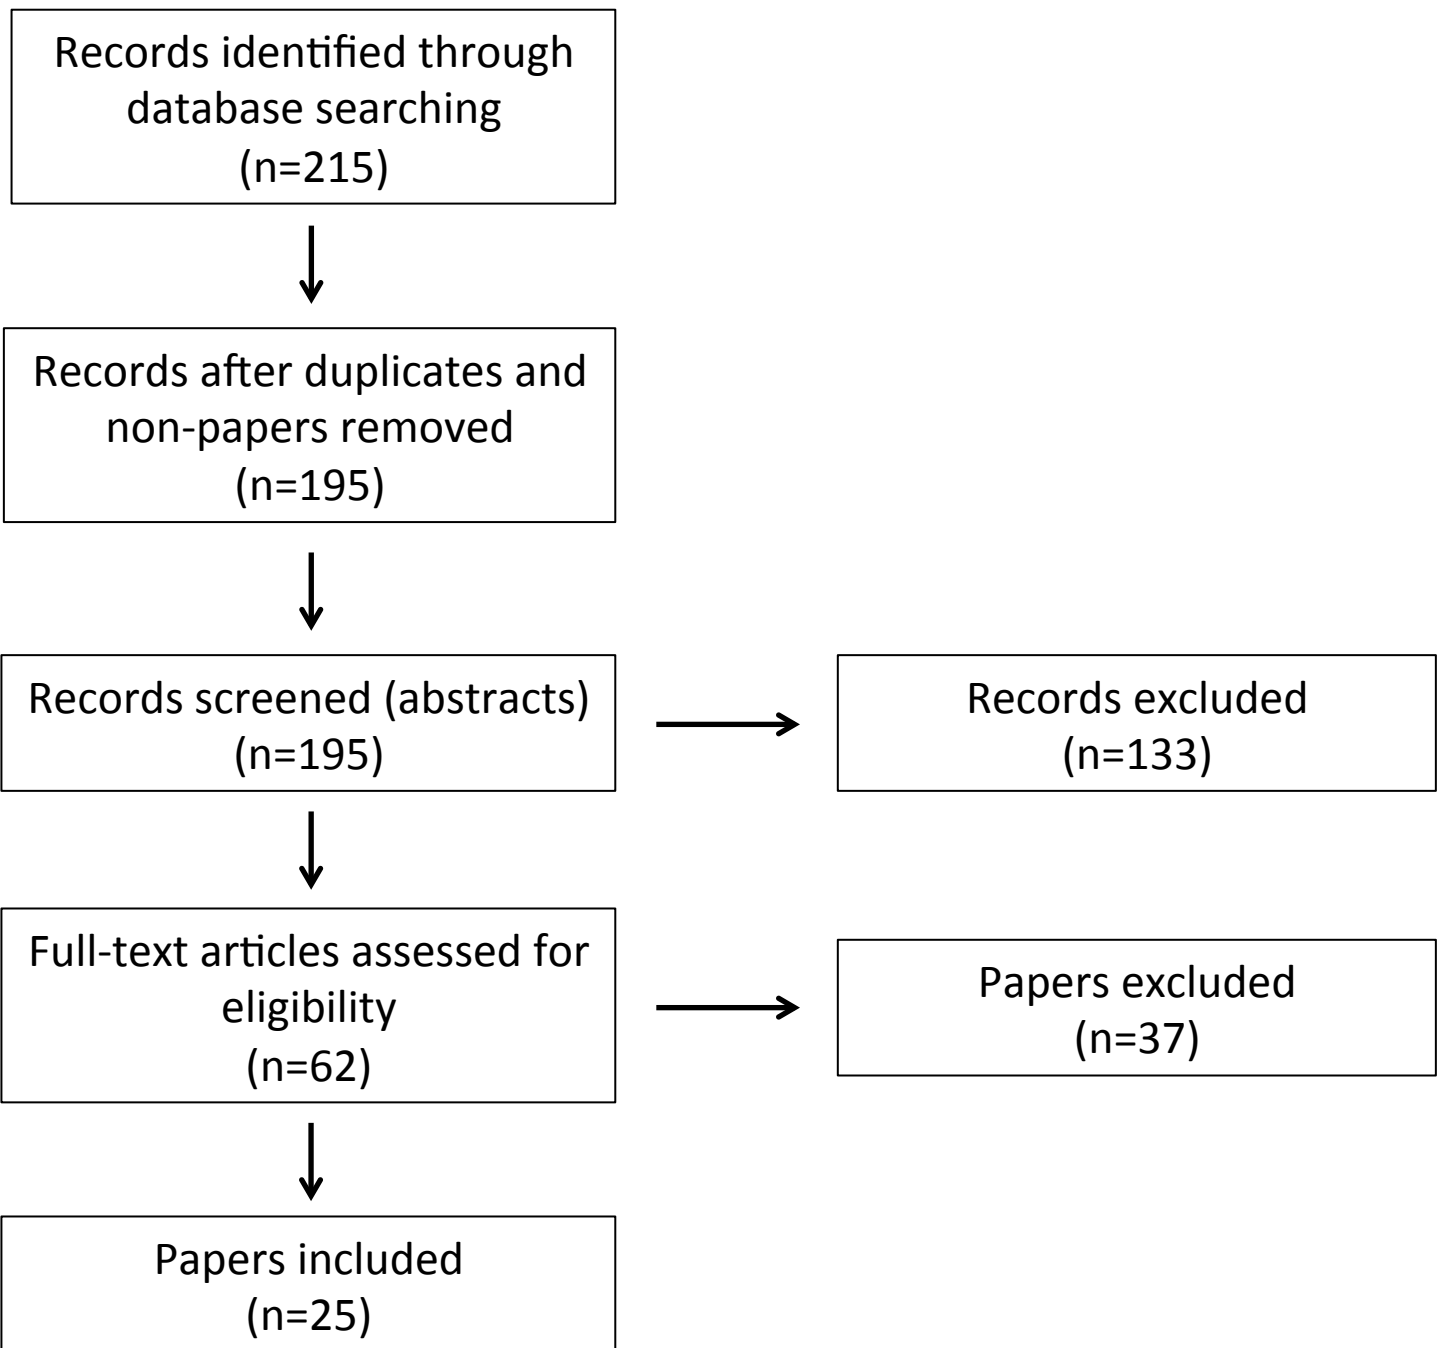

Supplement: PRISMA_Flow_Diagram_Revision.pdf [file PRISMA_Flow_Diagram_Revision.pdf]
